# Supplementary material for: Genome Sequence of Brevundimonas sp., an Arsenic Resistant Soil Bacterium
Source: MDPI journal article supplement (doi:10.3390/d13080344), 2021-07-27
Supplement: s1 [file s1]

# Supplementary Materials

**Table S1.** Genome statistics.

| Attribute                | Value     |
|--------------------------|-----------|
| Genome size (bp)         | 3,343,585 |
| DNA coding (bp)          | 2,951,289 |
| DNA G + C (bp)           | 2,223,709 |
| DNA scaffolds            | 7         |
| Total genes              | 3,275     |
| Protein coding genes     | 3,185     |
| RNA genes                | 58        |
| Pseudo genes             | 32        |
| Genes in SEED subsystems | 1391      |
| CRISPR repeats           | 0         |

**Table S2.** Project information.

| Property                 | Term                       |
|--------------------------|----------------------------|
| Finishing quality        | Draft                      |
| Libraries used           | Paired End                 |
| Sequencing platforms     | Illumina MiSeq             |
| Fold coverage            | 70x                        |
| Assemblers               | A5 pipeline, SOAPdenovo v2 |
| Gene calling method      | Prodigal                   |
| Genbank ID               | SPVH00000000.1             |
| Genebank Date of Release | 3-April-2019               |
| BIOPROJECT               | PRJNA505530                |

**Table S3.** BUSCO results: The number of single copy conserved orthologs found in the genome.

| Parameter         | Value        |
|-------------------|--------------|
| Complete BUSCO    | 430 (99.5%)  |
| Single-copy BUSCO | 429 (99.3%)  |
| Duplicated BUSCO  | 1 (0.2%)     |
| Fragmented BUSCO  | 2 (0.5%)     |
| Missing BUSCO     | 0 (0.0%)     |
| Total BUSCO genes | 432 (100.0%) |
